# Supplementary material for: The “Hub and Spoke” (Hands) Ecmo for “Resuscitating” Neonates With Respiratory Life Threatening Conditions
Source: Preprints.org preprint supplement (doi:10.20944/preprints202012.0725.v1), 2020-12-29
Supplement: Supplementary file 1 [file supplementary]

Supplemental Table 1. “SPOKE” CENTER ECMO CHECKLIST

- **Order blood** for ECMO circuit priming and for emergency (2 adults packed RBCs) O
- **Provide a scrub nurse** O
- **Investigations to be made**:

Cranial ultrasound O

Echocardiogram O

Chest x-ray O

- **Recent lab tests**:

Hb, WBC, Platelets, CRP, PCT, Alb, ionized Ca, Cr, Urea, Bilirubine O

Lactate, APTT, prothrombin complex, Fibrinogen, D-dimer, Antithrombin O

Arterial blood gas O

Cardiac enzymes O

- **Patient preparation**:

CVC (leave neck access free, available for ECMO implant) O

Arterial -line O

Securely fixed endotracheal tube O

Indwelling catheter O

Space to set up the ECMO system and sterile instrument back table O

Height adjustable incubator with no matress O

Metal utility cart O

IV pole on casters O

External defibrillator (neonatal) O

- Alert in advance the **radiology technician** to be available for x-ray after implant O
- **Relatives/parents** should be available to obtain full informed consent O

Supplemental Table 2. Pre-HandS demographic data form (for physisican)

- Hub Center____________________ Spoke Center____________________
- Pt demographic
- Name_______________________ DOB_______________________
- Gender______________________Contact __________________
- Weight Gestational Age
- Reason for HandS Transfer
- Prematurity
- Respiratory failure
- RDS
- MAS
- PNX
- CDH
- Apnea
- Bronchioltis
- Other_________________________________
- Cardiac Failure
- Neurological disorder
- Surgical
- Other cause
- Level of severity of clinical conditions:
- Mild
- Moderate

SevereSupplemental Table 3. Pediatric HandS ECMO transfer form (for Pediatric ICU nurse)

| Parameter | At 1st call | At SPOKE | During transfer | At HUB |
| --- | --- | --- | --- | --- |
| Cyanosis |  |  |  |  |
| Icterus |  |  |  |  |
| Paleness |  |  |  |  |
| RDS |  |  |  |  |
| Shock |  |  |  |  |
| epilepsy |  |  |  |  |
| Hypo/hyperactivity |  |  |  |  |
| Urine output? |  |  |  |  |
| Body Temperature (degrees C) |  |  |  |  |
| HR |  |  |  |  |
| RR |  |  |  |  |
| Transcutaneous SatO2 |  |  |  |  |
| PA |  |  |  |  |
| Htc % |  |  |  |  |
| pH |  |  |  |  |
| pO2 |  |  |  |  |
| pCO2 |  |  |  |  |
| HCO3 |  |  |  |  |
| ABE |  |  |  |  |
| FiO2 |  |  |  |  |
| Mechanical ventilation |  |  |  |  |
| CPAP |  |  |  |  |
| Intubation AMBU vent |  |  |  |  |
| Intubation mech Vent. |  |  |  |  |
| PI/PEEP |  |  |  |  |
| RR (if mechanical vent) |  |  |  |  |
| Tidal |  |  |  |  |
| CXR |  |  |  |  |
| Echocardiography |  |  |  |  |
| Cerebral US |  |  |  |  |
| Lines  Vein  Umbelical artery  NG tube |  |  |  |  |
| Chest tube |  |  |  |  |
| Medication list |  |  |  |  |
| PGE1 |  |  |  |  |
| Surfactant done? |  |  |  |  |
| CPR ? |  |  |  |  |

Supplemental Table 4. Pediatric HandS ECMO data form (for the pefusionist)

- Hub Center____________________ Spoke Center____________________
- Pt demographic
- First and Last Name_________________________________________
- DOB_______________________ Gestational Age_________________
- Gender______________________ BSA ___________________________
- Weight ________________Height _______________
- Reason for HandS Transfer: Diagnosis________________________________
- Prematurity
- Respiratory failure
- RDS
- MAS
- PNX
- CDH
- Apnea
- Bronchioltis
- Other_________________________________
- Cardiac Failure
- Neurological disorder
- Surgical
- Other cause
- ECMO details
- Pump type________________________________________________
- ECMO circuit type _________________________________________
- Oxygenator type ___________________________________________
- Site of arterial cannulation ___________________________________
- Type or arterial cannula (size)________________________________
- Site of venous cannulation___________________________________
- Type of venous cannula (size)________________________________
- Type of Priming____________________________________________
- Flow (l/min)_______________
- Cannulation time(min)_______
- TAT (min)___________________EIT (min)______________________
- Wean off? y/n __________________________ECMO duration (days)__________
- Date of end ECMO_____________________________________
- Outcome: alive/dead
- Complications:
- None
- Hemorrhage/thrombosis
- Cannula dislocation
- Stroke
- Infection
- Change of ECMO: y/n
- Other
